# Supplementary material for: Pyrimidine-containing β-iminoenolate difluoroboron complexes acting as non-traditional π-gelators and mechanofluorochromic dyes
Source: Royal Society of Chemistry journal article supplement (doi:10.1039/c8nj01508b), 2018-01-01

**Supporting information for**

**Pyrimidine-containing  $\beta$ -iminoenolate difluoroboron  
complexes acting as non-traditional  $\pi$ -gelators and  
mechanofluorochromic dyes**

Wenhua Mi, Zhiyu Qu, Jingbo Sun, Fushuang Zhang, Lu Zhai, Jinyu Zhao, Kaiqi Ye\*

*State Key Laboratory of Supramolecular Structure and Materials, College of Chemistry, Jilin*

*University, Changchun, P. R. China.*

*Corresponding Author: [yekq@jlu.edu.cn](mailto:yekq@jlu.edu.cn)*

**Table S1** Photophysical data of **CPPA**, **TCPPA**, **CPPAB**, **TCPPAB** in different solvents.

| Compound      | Solvents                        | $\lambda_{\text{abs}}^{\text{max}}/\text{nm}$ | $\lambda_{\text{em}}/\text{nm}$ | Stokes shift <sup>a</sup> / $\text{cm}^{-1}$ | $\Phi_{\text{F}}$ <sup>b</sup> |
|---------------|---------------------------------|-----------------------------------------------|---------------------------------|----------------------------------------------|--------------------------------|
| <b>CPPA</b>   | Cyclohexane                     | 289, 376                                      | 459, 485                        | 4809                                         | < 0.01                         |
|               | Toluene                         | 291, 376                                      | 462                             | 4951                                         | < 0.01                         |
|               | THF                             | 290, 370                                      | 462                             | 5382                                         | < 0.01                         |
|               | Chloroform                      | 290, 370                                      | 474                             | 5930                                         | < 0.01                         |
|               | CH <sub>2</sub> Cl <sub>2</sub> | 290, 370                                      | 478                             | 6107                                         | < 0.01                         |
|               | DMSO                            | 292, 376                                      | 501                             | 6636                                         | < 0.01                         |
| <b>TCPPA</b>  | Cyclohexane                     | 296, 387                                      | 472, 453                        | 4653                                         | < 0.01                         |
|               | Toluene                         | 294, 380                                      | 455                             | 4338                                         | < 0.01                         |
|               | THF                             | 294, 388                                      | 483                             | 5069                                         | < 0.01                         |
|               | Chloroform                      | 295, 382                                      | 499                             | 6138                                         | < 0.01                         |
|               | CH <sub>2</sub> Cl <sub>2</sub> | 295, 382                                      | 508                             | 6454                                         | < 0.01                         |
|               | DMSO                            | 295, 386                                      | 529                             | 7003                                         | < 0.01                         |
| <b>CPPAB</b>  | Cyclohexane                     | 289, 322, 339, 410, 430                       | 446, 486                        | 1969                                         | 0.97                           |
|               | Toluene                         | 291, 325, 339, 411                            | 482                             | 3584                                         | 0.95                           |
|               | THF                             | 290, 323, 338, 402                            | 522                             | 5719                                         | 0.44                           |
|               | Chloroform                      | 290, 325, 340, 413                            | 535                             | 5521                                         | 0.51                           |
|               | CH <sub>2</sub> Cl <sub>2</sub> | 291, 325, 340, 409                            | 551                             | 6301                                         | 0.42                           |
|               | DMSO                            | 289, 326, 340, 404                            | 583                             | 7600                                         | 0.03                           |
| <b>TCPPAB</b> | Cyclohexane                     | 295, 371, 429, 445                            | 465, 491                        | 1805                                         | 0.74                           |
|               | Toluene                         | 297, 375, 430                                 | 504                             | 3415                                         | 0.53                           |
|               | THF                             | 293, 373, 435                                 | 565                             | 5289                                         | 0.34                           |
|               | Chloroform                      | 294, 374, 429                                 | 571                             | 5797                                         | 0.46                           |
|               | CH <sub>2</sub> Cl <sub>2</sub> | 297, 374, 429                                 | 595                             | 6861                                         | 0.06                           |

<sup>a</sup> Calculated from the difference of  $\lambda_{\text{em}}$  and  $\lambda_{\text{abs}}^{\text{max}}$ ;<sup>b</sup> Fluorescence quantum yields were determined by a standard method with diphenylanthracene in benzene ( $\Phi_{\text{F}} = 0.85$ ,  $\lambda_{\text{ex}} = 390$  nm) as reference.

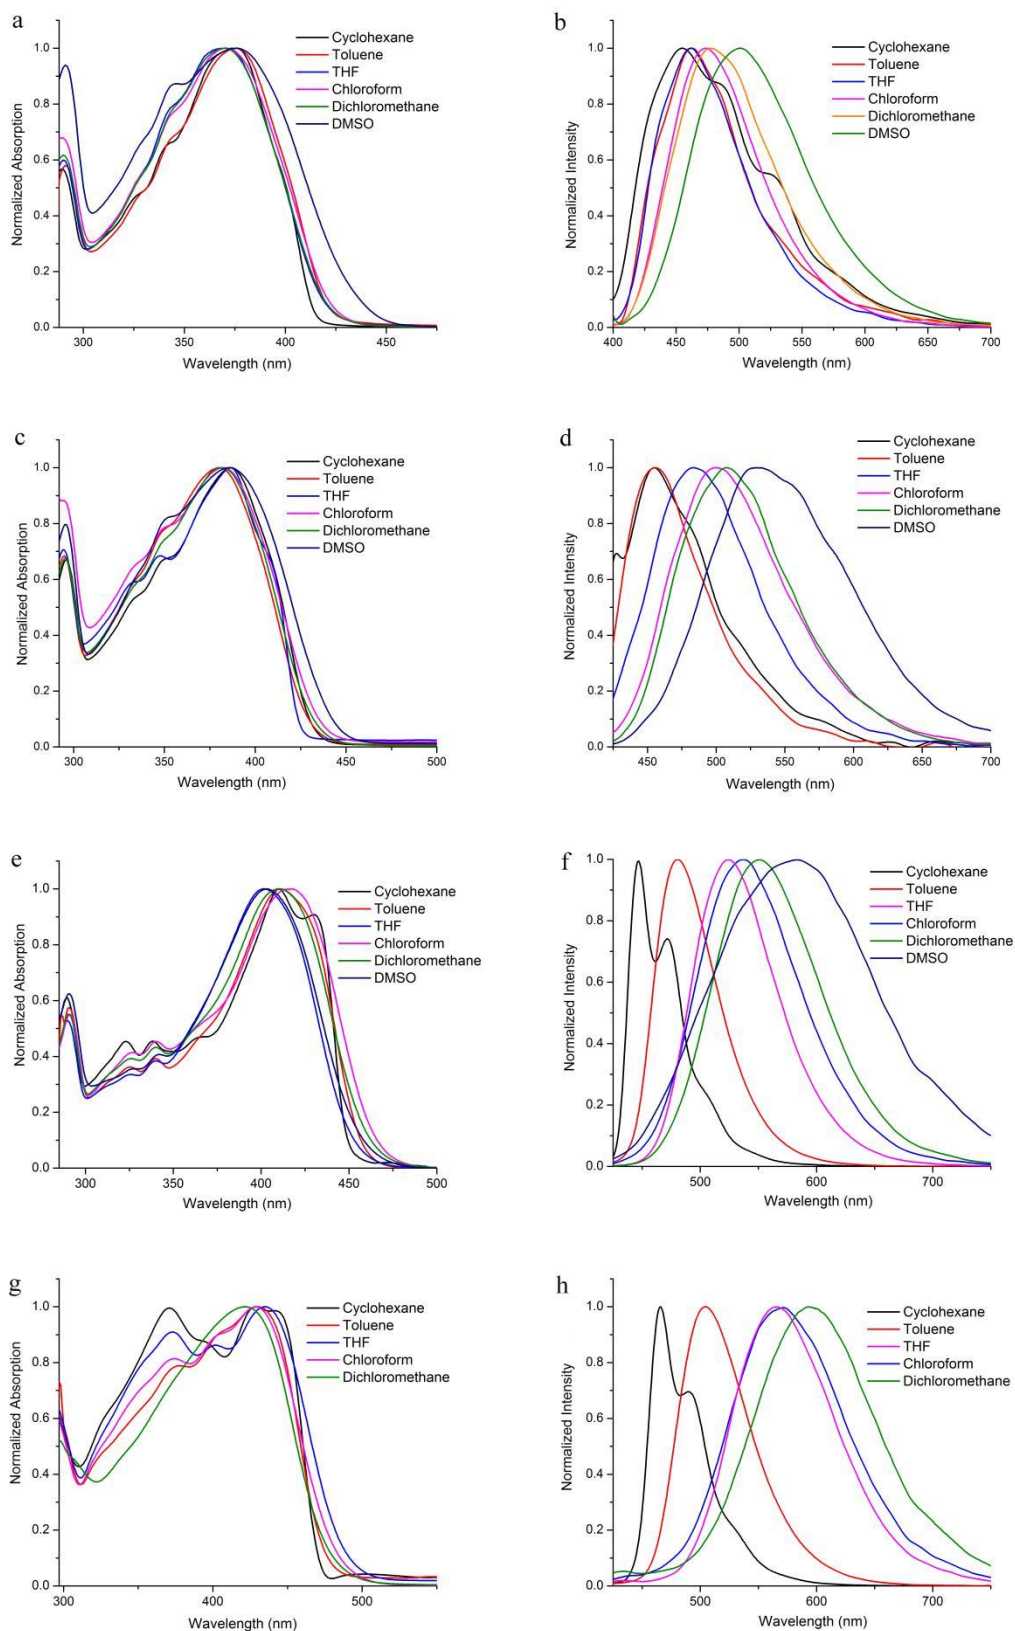

**Figure S1.** Normalized UV-vis absorption spectra of **CPPA** (a), **TCPPA** (c), **CPPAB** (e) and **TCPPAB** (g) and fluorescence emission spectra of **CPPA** (b), **TCPPA** (d), **CPPA** (f) and **TCPPAB** (h) in different solvents ( $5.0 \times 10^{-5}$  M,  $\lambda_{\text{ex}} = 390$  nm).

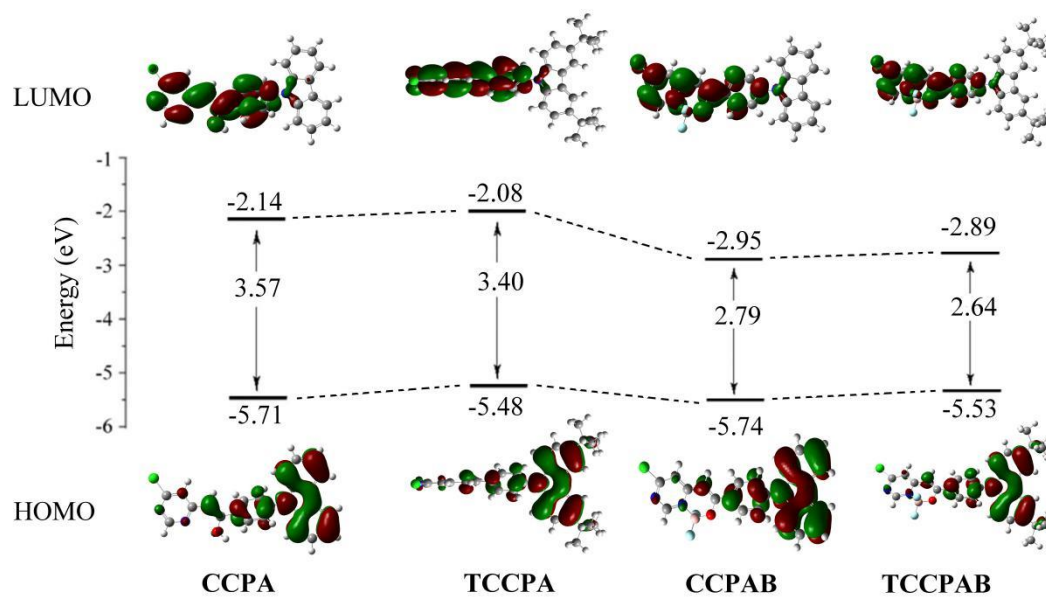

**Figure S2.** Energy levels and molecular orbital surfaces of **CCPA**, **TCCPA**, **CCPAB** and **TCCPAB** in the optimized ground-state structures.

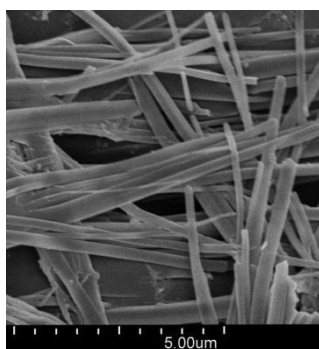

**Figure S3.** SEM image of the xerogel **TCPPAB** obtained from methylcyclohexane/1,4-dioxane ( $v/v = 10/1$ ).

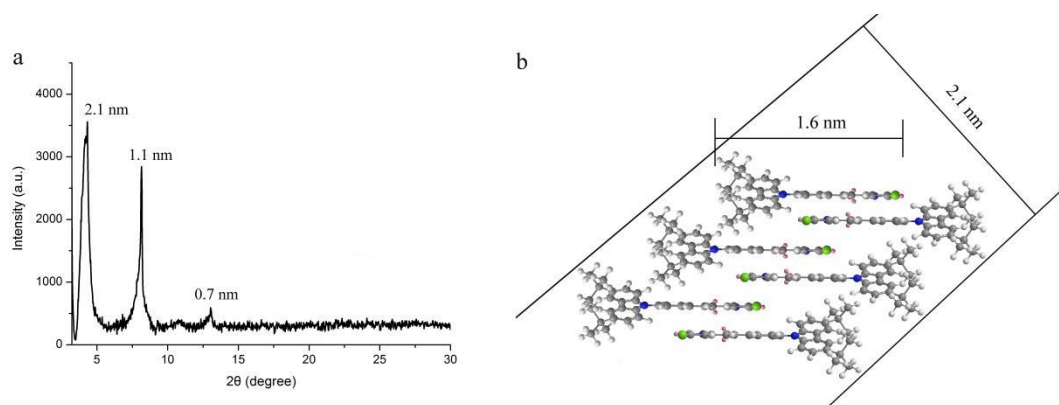

**Figure S4.** (a) XRD pattern of xerogel TCPPA and (b) the proposed molecular packing in xerogel TCPPA obtained from cyclohexane.

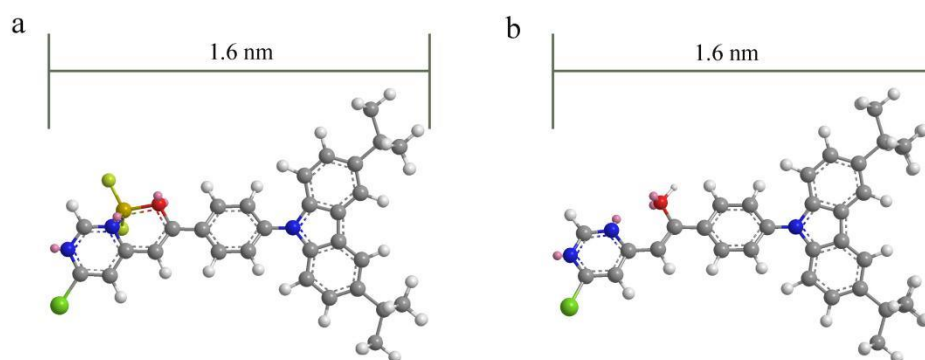

**Figure S5.** The molecular configurations of TCPPAB (a) and TCPPA (b) in optimized geometry based on DFT calculations.

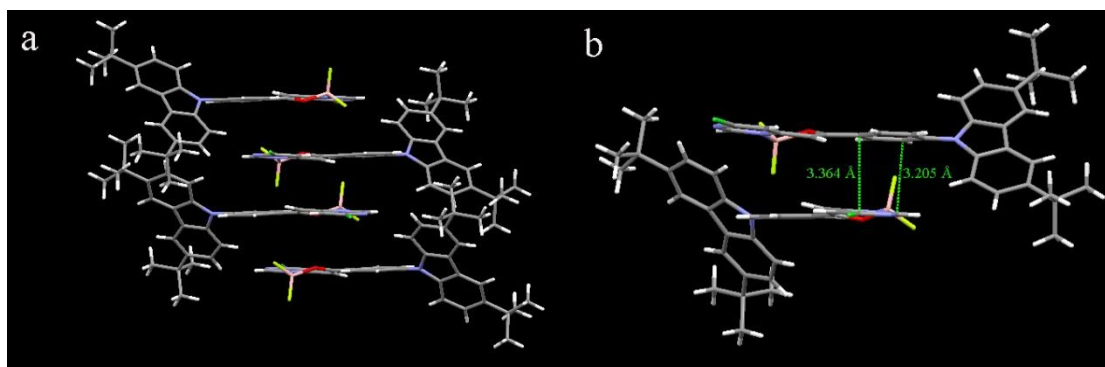

**Figure S6.** (a) Single-crystal structure of **TCPPAB** from side view and (b)  $\pi$ - $\pi$  interactions in single crystal.

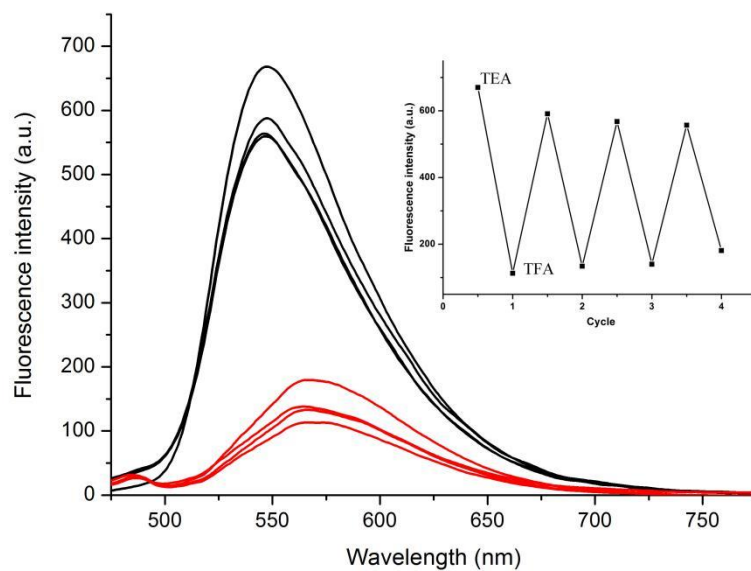

**Figure S7.** The fluorescence emission spectra of **TCPPAB** in xerogel-based film upon exposed to TFA (red) and TEA vapors (black) repeatedly ( $\lambda_{\text{ex}} = 420$  nm). Inset: the emission intensity at 547 nm of **TCPPAB** in xerogel-based film upon exposed to TFA and TEA vapors repeatedly.

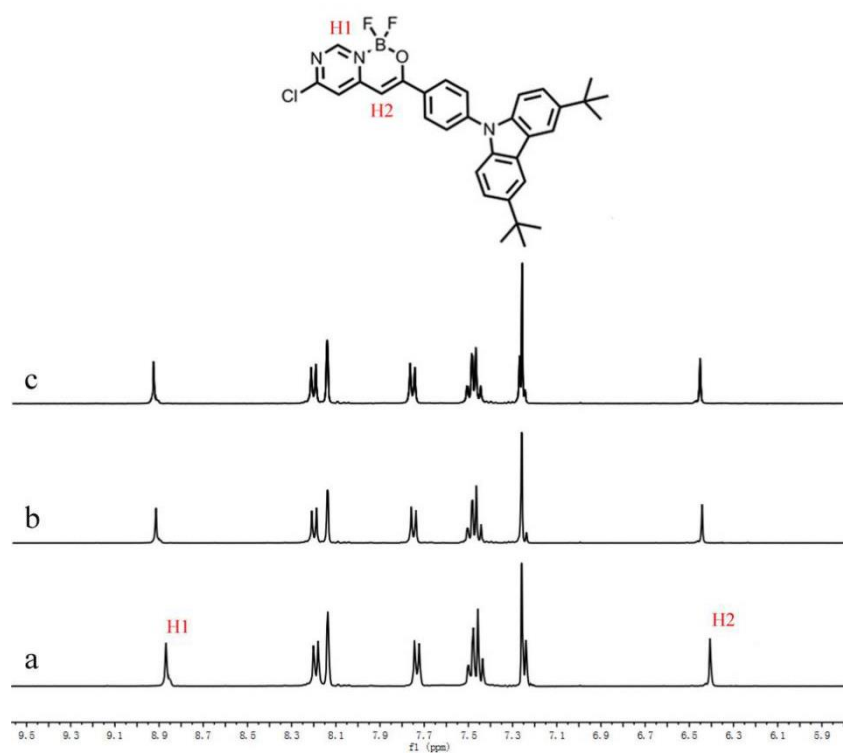

**Figure S8.** <sup>1</sup>H NMR spectra of TCPPAB before (a) and after adding 6.0 equiv. (b) as well as 20.0 equiv. (c) of TFA in CDCl<sub>3</sub>.

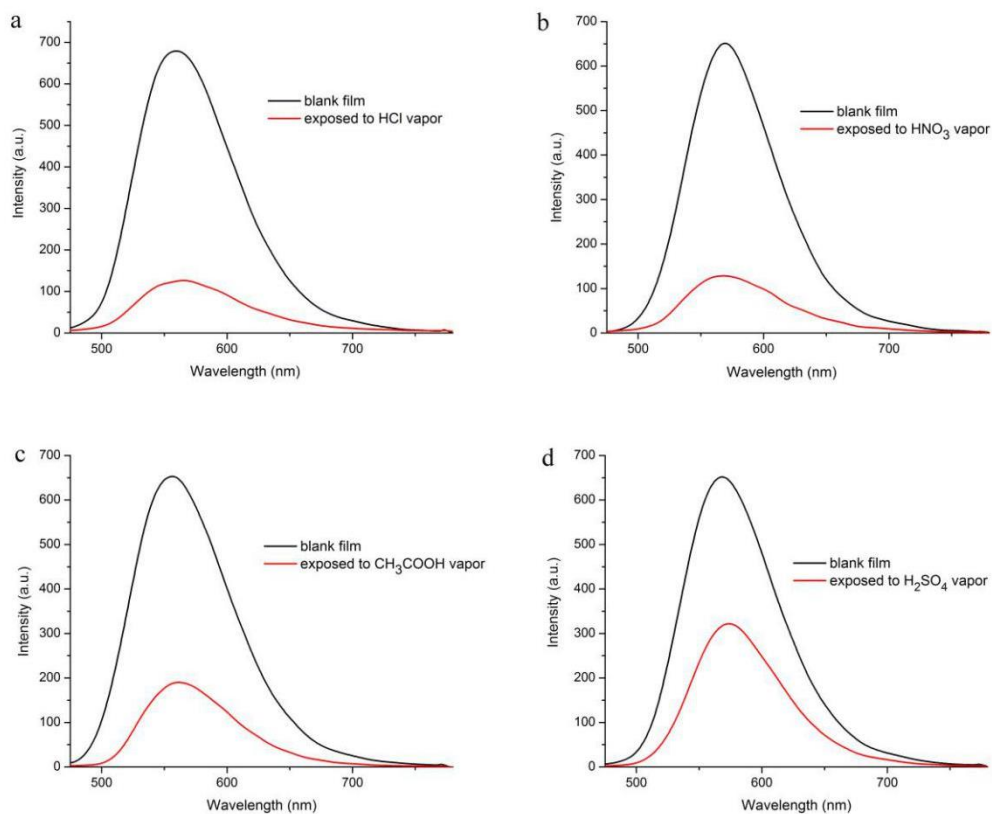

**Figure S9.** Fluorescence spectral changes of xerogel-film **TCPPAB** upon exposure to vapors of (a) HCl, (b) HNO<sub>3</sub>, (c) CH<sub>3</sub>COOH, (d) H<sub>2</sub>SO<sub>4</sub>.

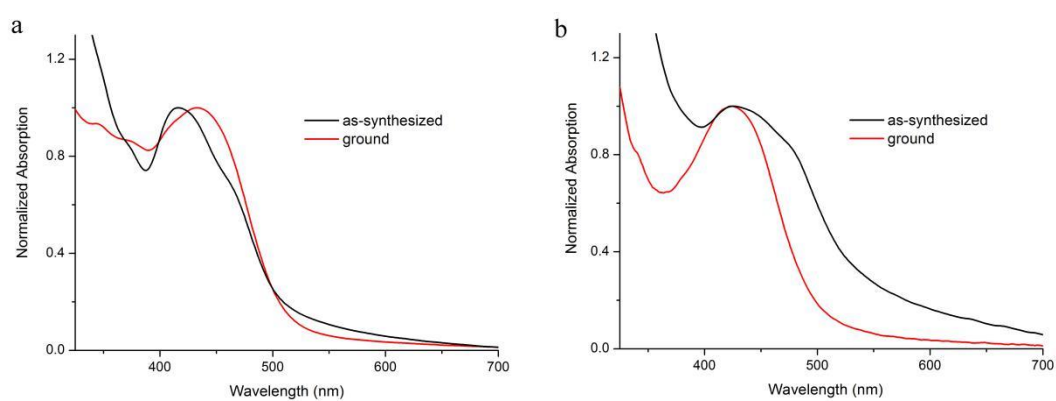

**Figure S10.** UV-vis spectra of **TCPPAB** (a) and **CPPAB** (b) in different solid-state measured in a reflection mode.



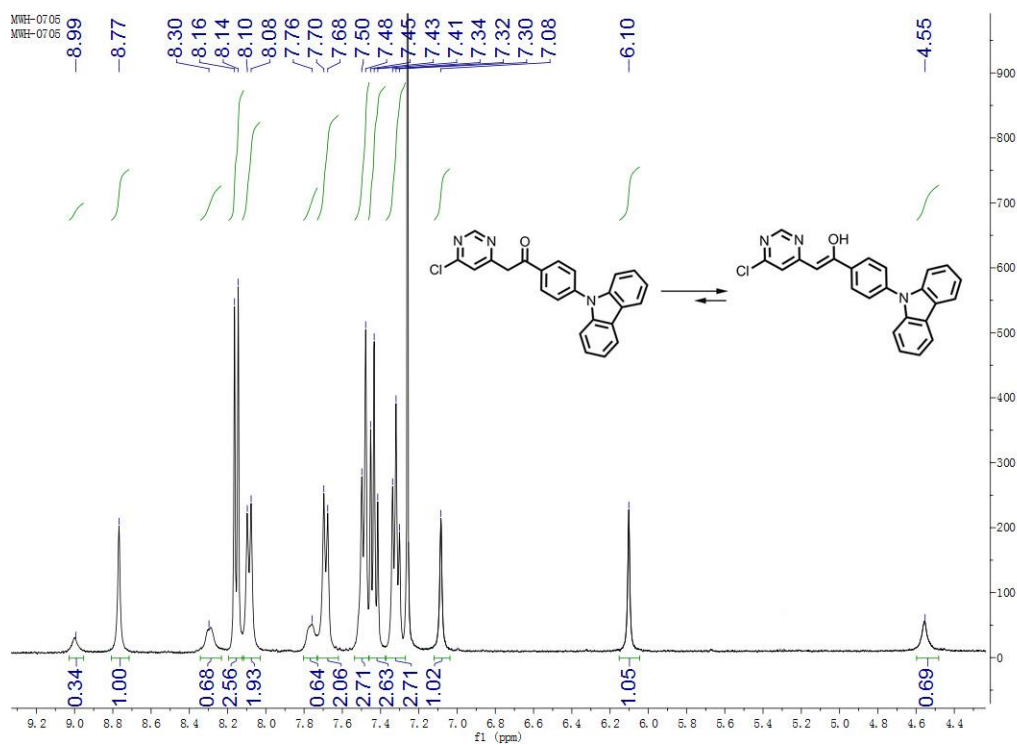

**Figure S11.**  $^1\text{H}$  NMR (400 MHz) spectrum of CPPA in  $\text{CDCl}_3$ .

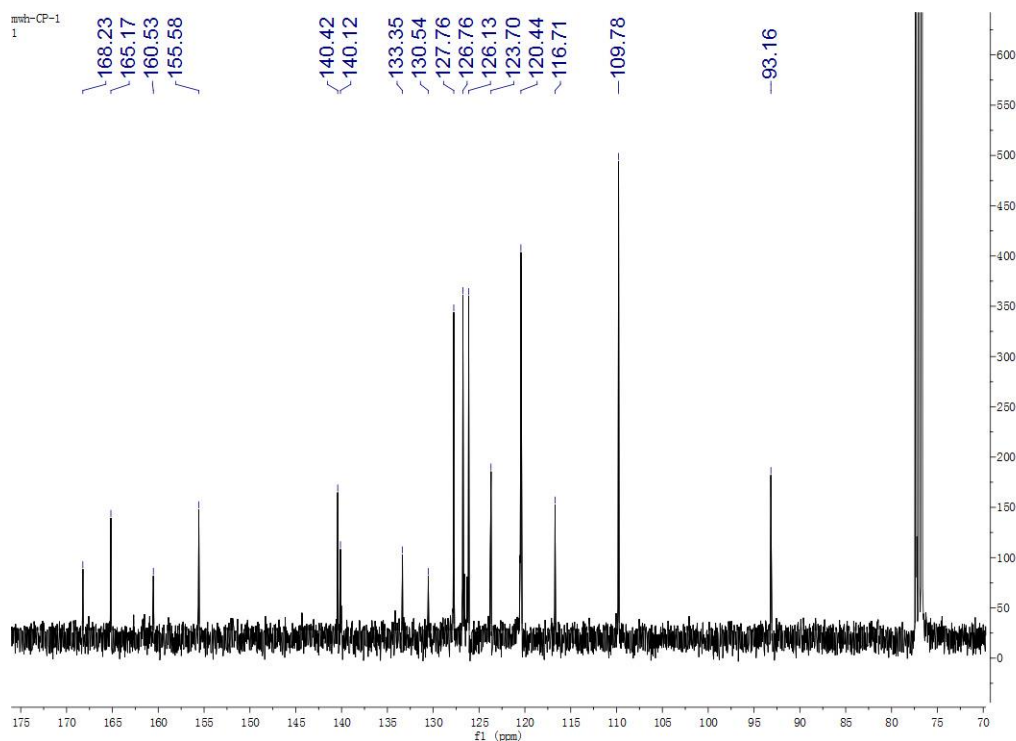

**Figure S12.**  $^{13}\text{C}$  NMR (100 MHz) spectrum of CPPA in  $\text{CDCl}_3$ .

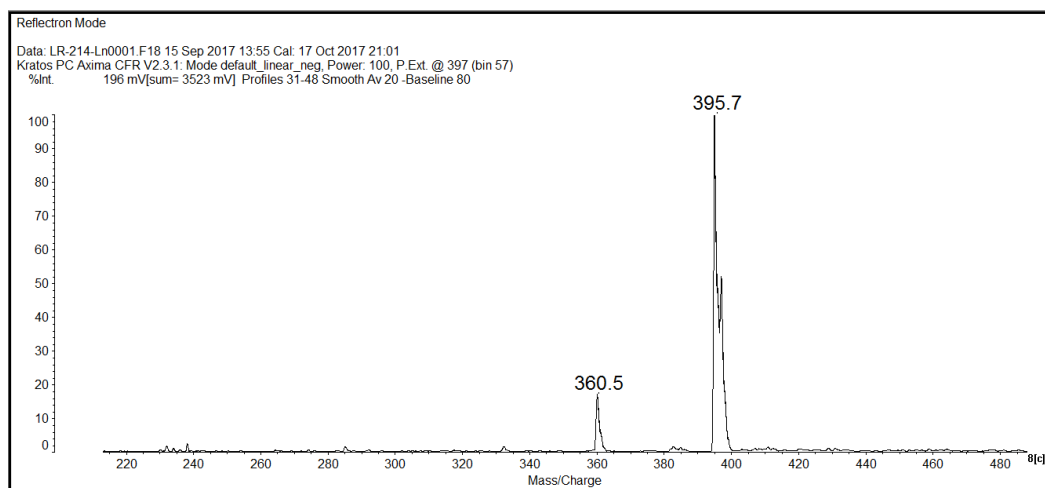

**Figure S13.** The MALDI-TOF mass spectrum of CPPA.

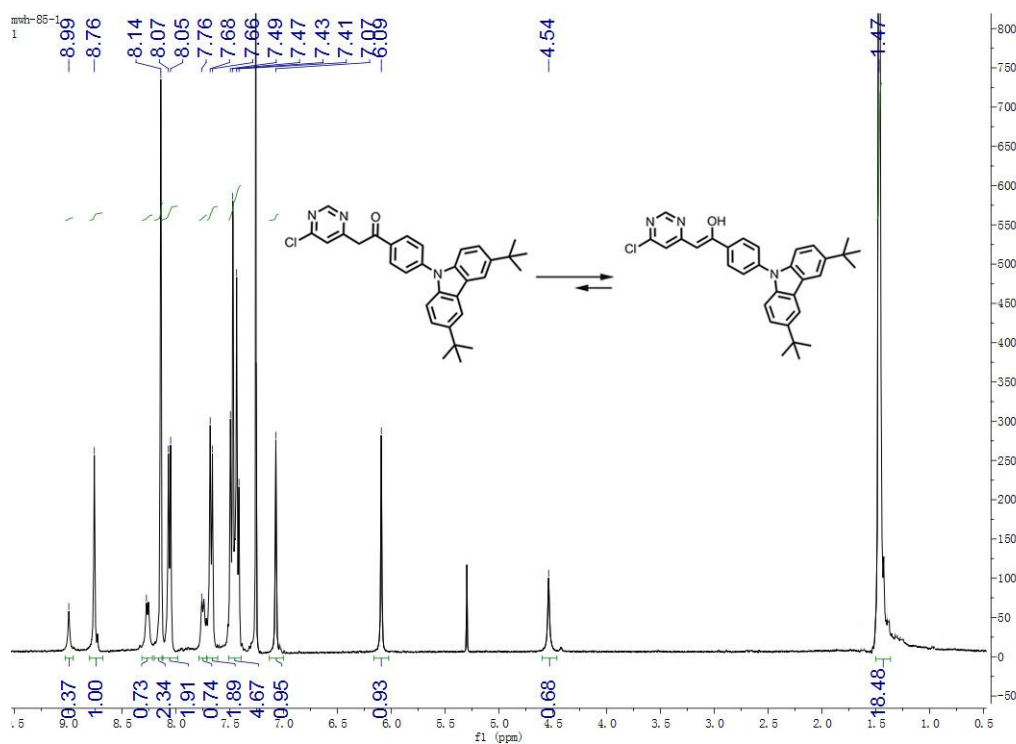

**Figure S14.**  $^1\text{H}$  NMR (400 MHz) spectrum of TCPPA in  $\text{CDCl}_3$ .

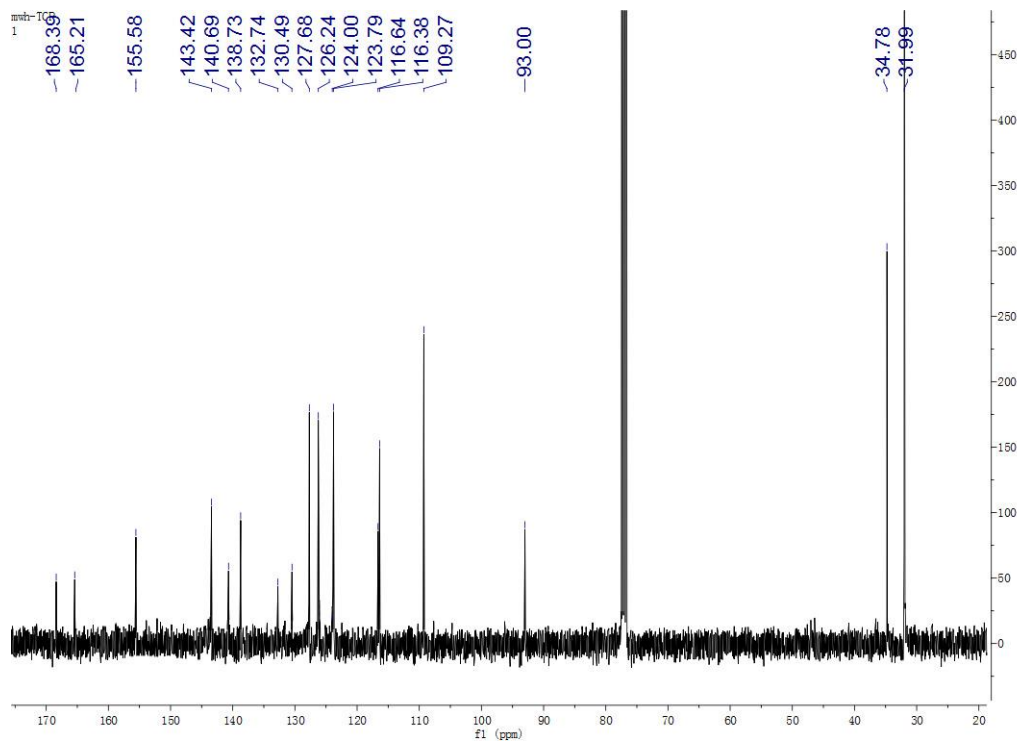

**Figure S15.**  $^{13}\text{C}$  NMR (100 MHz) spectrum of TCPPA in  $\text{CDCl}_3$ .

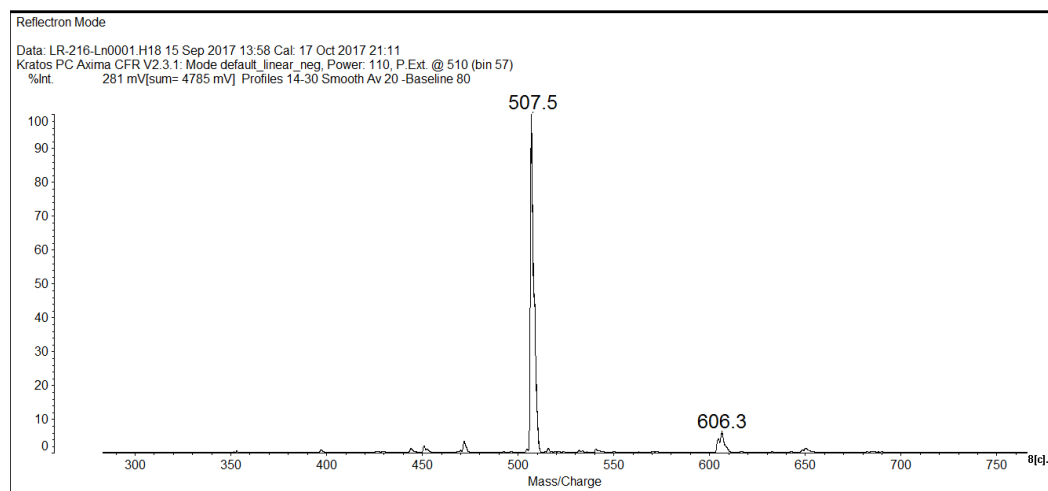

**Figure S16.** The MALDI-TOF mass spectrum of TCPPA.

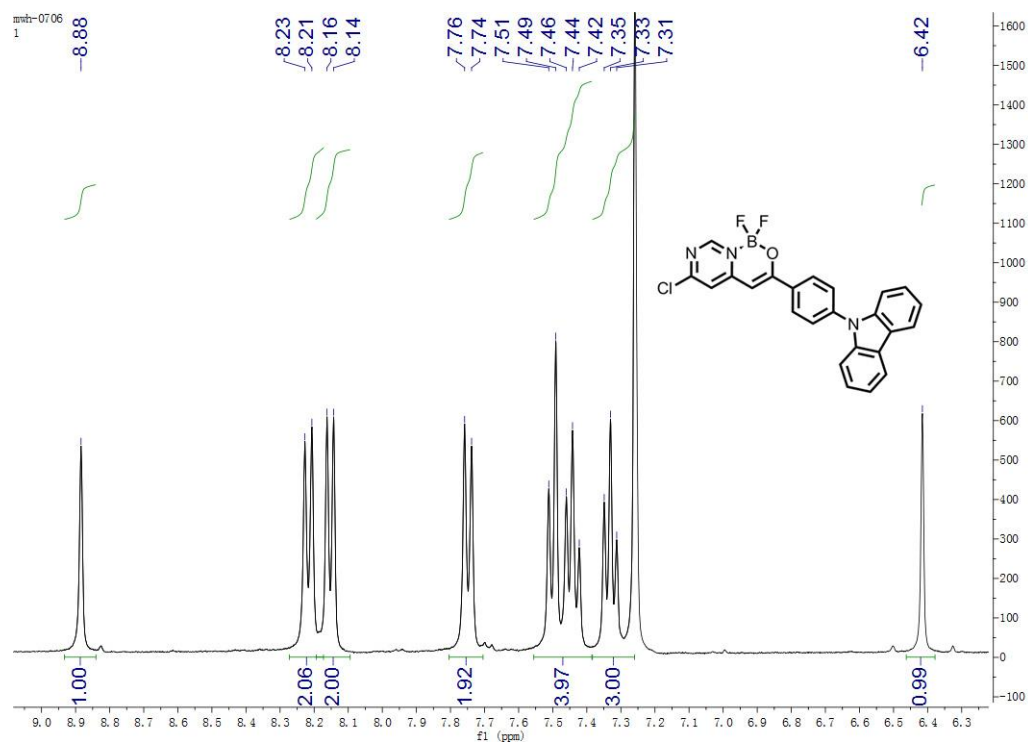

**Figure S17.**  $^1\text{H}$  NMR (400 MHz) spectrum of **CPPAB** in  $\text{CDCl}_3$ .

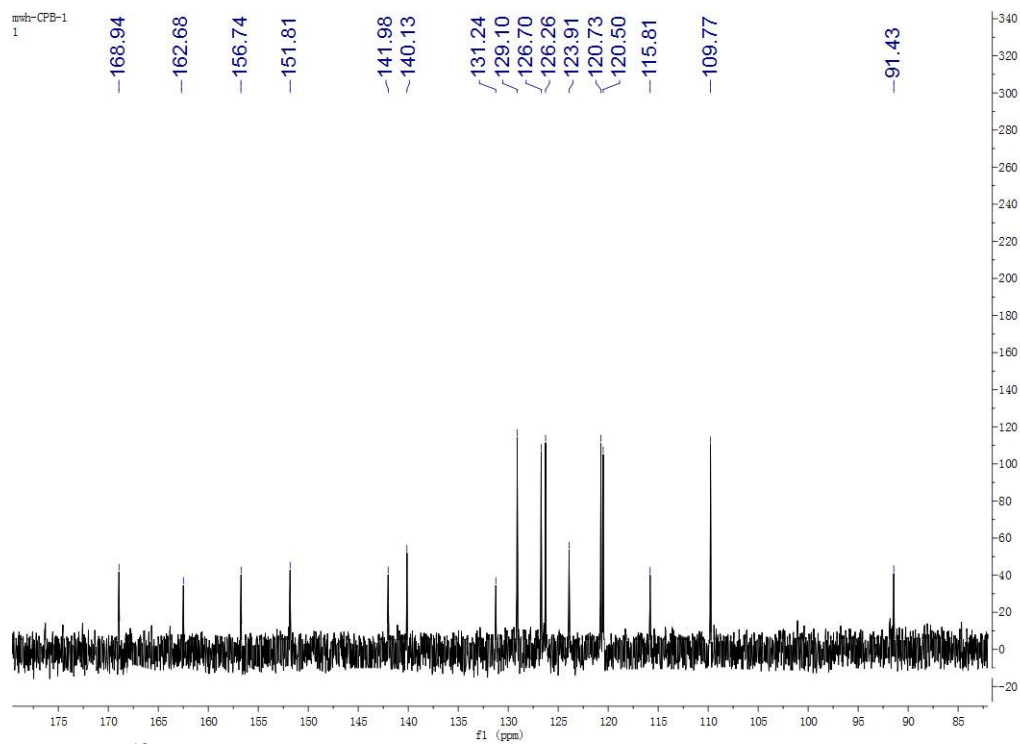

**Figure S18.**  $^{13}\text{C}$  NMR (100 MHz) spectrum of **CPPAB** in  $\text{CDCl}_3$ .

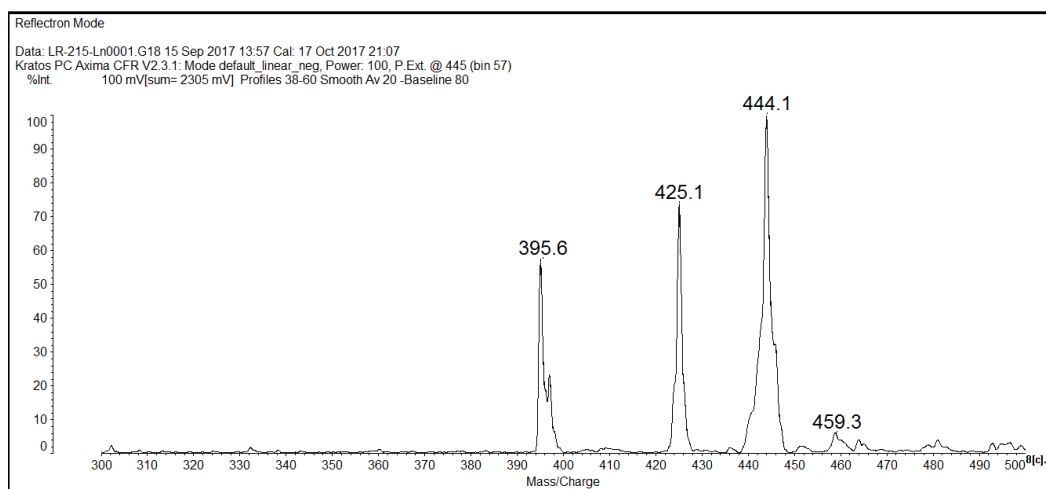

**Figure S19.** The MALDI-TOF mass spectrum of **CPPAB**.

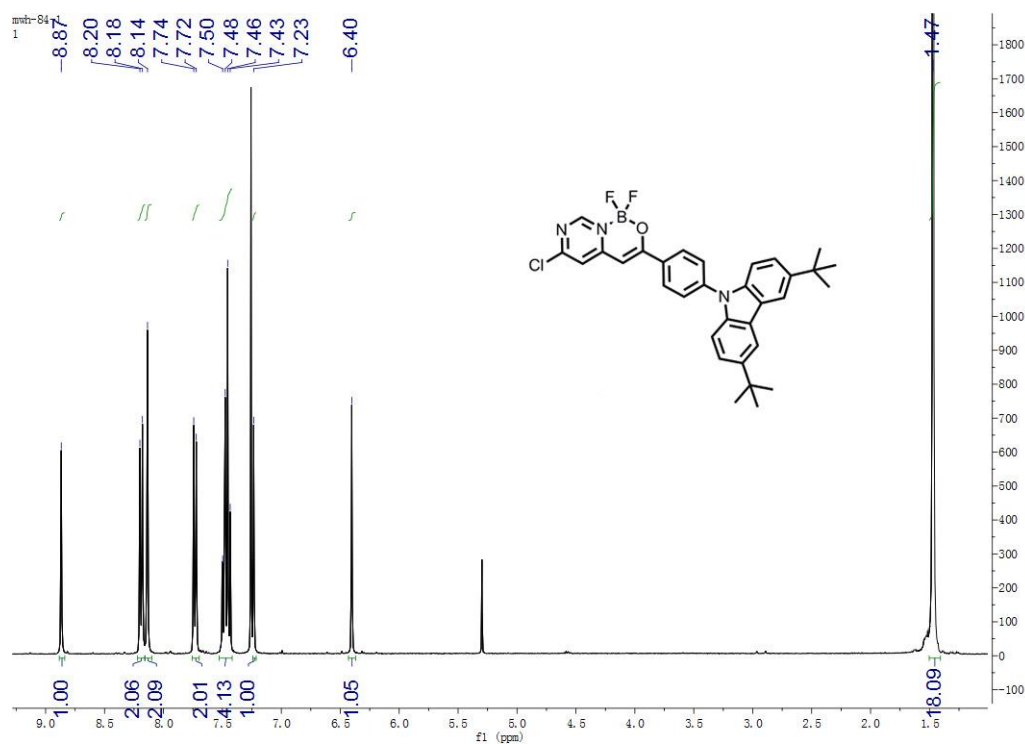

**Figure S20.** <sup>1</sup>H NMR (400 MHz) spectrum of **TCPPAB** in CDCl<sub>3</sub>.

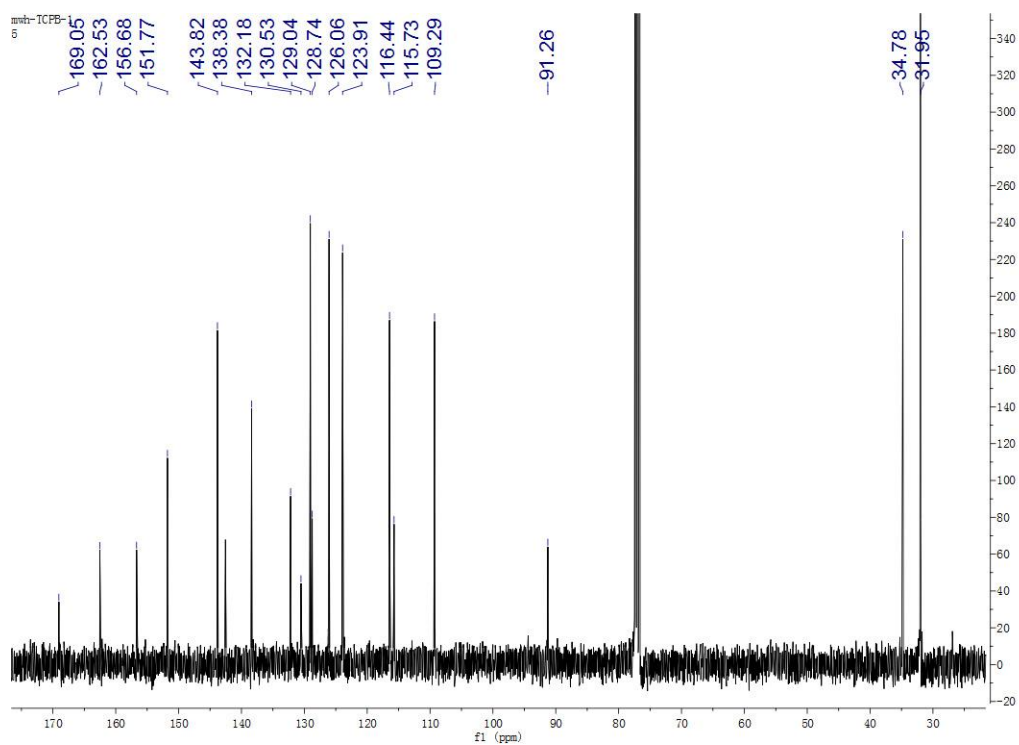

**Figure S21.** <sup>13</sup>C NMR (100 MHz) spectrum of TCPPAB in CDCl<sub>3</sub>.

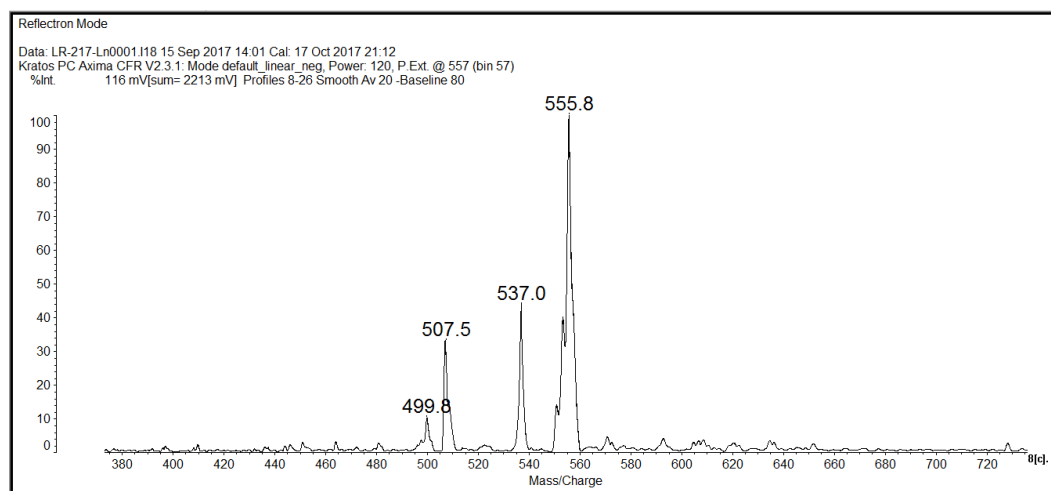

**Figure S22.** The MALDI-TOF mass spectrum of TCPPAB.

# checkCIF/PLATON report

You have not supplied any structure factors. As a result the full set of tests cannot be run.

THIS REPORT IS FOR GUIDANCE ONLY. IF USED AS PART OF A REVIEW PROCEDURE FOR PUBLICATION, IT SHOULD NOT REPLACE THE EXPERTISE OF AN EXPERIENCED CRYSTALLOGRAPHIC REFEREE.

No syntax errors found.      CIF dictionary      Interpreting this report

## Datablock: 1

---

|                 |                                                 |                                             |
|-----------------|-------------------------------------------------|---------------------------------------------|
| Bond precision: | C-C = 0.0018 A                                  | Wavelength=0.71073                          |
| Cell:           | a=24.409(2)      b=9.5355(8)      c=13.1083(10) | alpha=90      beta=103.983(3)      gamma=90 |
| Temperature:    | 160 K                                           |                                             |
|                 | Calculated                                      | Reported                                    |
| Volume          | 2960.6(4)                                       | 2960.6(4)                                   |
| Space group     | P 21/c                                          | P 1 21/c 1                                  |
| Hall group      | -P 2ybc                                         | -P 2ybc                                     |
| Moiety formula  | C32 H31 B Cl F2 N3 O                            | C32 H31 B Cl F2 N3 O                        |
| Sum formula     | C32 H31 B Cl F2 N3 O                            | C32 H31 B Cl F2 N3 O                        |
| Mr              | 557.86                                          | 557.86                                      |
| Dx,g cm-3       | 1.252                                           | 1.252                                       |
| Z               | 4                                               | 4                                           |
| Mu (mm-1)       | 0.171                                           | 0.171                                       |
| F000            | 1168.0                                          | 1168.0                                      |
| F000'           | 1169.09                                         |                                             |
| h,k,lmax        | 31,12,17                                        | 31,12,17                                    |
| Nref            | 6810                                            | 6784                                        |
| Tmin,Tmax       | 0.978,0.981                                     |                                             |
| Tmin'           | 0.978                                           |                                             |

Correction method= Not given

Data completeness= 0.996      Theta(max)= 27.513

R(reflections)= 0.0344( 5592)      wR2(reflections)= 0.0908( 6784)

S = 1.020      Npar= 367

---

The following ALERTS were generated. Each ALERT has the format  
**test-name\_ALERT\_alert-type\_alert-level.**  
Click on the hyperlinks for more details of the test.

---

## ● Alert level C

PLAT601\_ALERT\_2\_C Structure Contains Solvent Accessible VOIDS of .

33 Ang\*\*3

---

## ● Alert level G

PLAT395\_ALERT\_2\_G Deviating X-O-Y Angle From 120 for O1

121.1 Degree

PLAT434\_ALERT\_2\_G Short Inter HL..HL Contact Cl1 ..F1

3.02 Ang.

- 
- 0 **ALERT level A** = Most likely a serious problem - resolve or explain
  - 0 **ALERT level B** = A potentially serious problem, consider carefully
  - 1 **ALERT level C** = Check. Ensure it is not caused by an omission or oversight
  - 2 **ALERT level G** = General information/check it is not something unexpected
- 
- 0 ALERT type 1 CIF construction/syntax error, inconsistent or missing data
  - 3 ALERT type 2 Indicator that the structure model may be wrong or deficient
  - 0 ALERT type 3 Indicator that the structure quality may be low
  - 0 ALERT type 4 Improvement, methodology, query or suggestion
  - 0 ALERT type 5 Informative message, check
- 

It is advisable to attempt to resolve as many as possible of the alerts in all categories. Often the minor alerts point to easily fixed oversights, errors and omissions in your CIF or refinement strategy, so attention to these fine details can be worthwhile. In order to resolve some of the more serious problems it may be necessary to carry out additional measurements or structure refinements. However, the purpose of your study may justify the reported deviations and the more serious of these should normally be commented upon in the discussion or experimental section of a paper or in the "special\_details" fields of the CIF. checkCIF was carefully designed to identify outliers and unusual parameters, but every test has its limitations and alerts that are not important in a particular case may appear. Conversely, the absence of alerts does not guarantee there are no aspects of the results needing attention. It is up to the individual to critically assess their own results and, if necessary, seek expert advice.

### Publication of your CIF in IUCr journals

A basic structural check has been run on your CIF. These basic checks will be run on all CIFs submitted for publication in IUCr journals (*Acta Crystallographica*, *Journal of Applied Crystallography*, *Journal of Synchrotron Radiation*); however, if you intend to submit to *Acta Crystallographica Section C* or *E* or *IUCrData*, you should make sure that full publication checks are run on the final version of your CIF prior to submission.

### Publication of your CIF in other journals

Please refer to the *Notes for Authors* of the relevant journal for any special instructions relating to CIF submission.

---

**PLATON version of 23/04/2018; check.def file version of 23/04/2018**



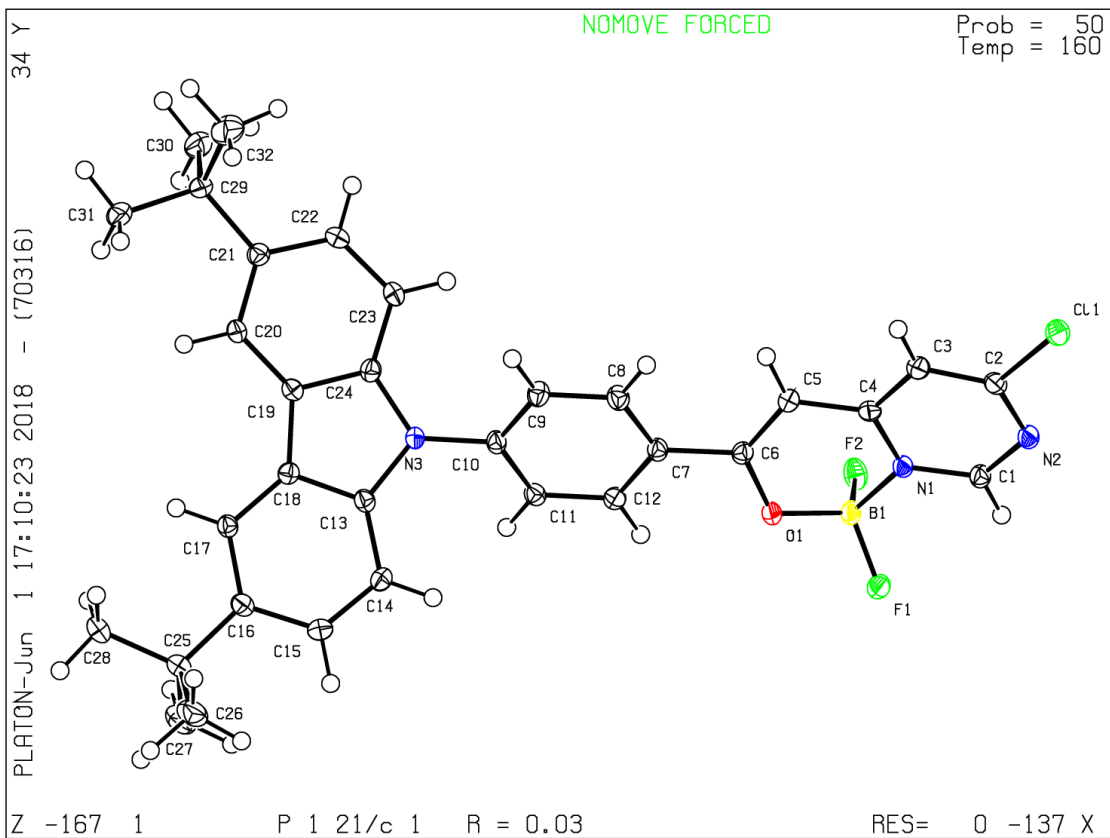

Supplement: c8nj01508b1.pdf [file c8nj01508b1.pdf]
